# Supplementary material
Source: MDPI journal article supplement (https://www.mdpi.com/2073-4433/15/3/378)
Supplement: s1 [file s1]

## Supplementary Materials:

Dioumacor Faye<sup>1</sup>, François Kaly<sup>2</sup>, Abdou Lahat Dieng<sup>1</sup>, Dahirou Wane<sup>1</sup>, Cheikh Modou Noreyni Fall<sup>1</sup>, Juliette Mignot<sup>3</sup> and Amadou Thierno Gaye

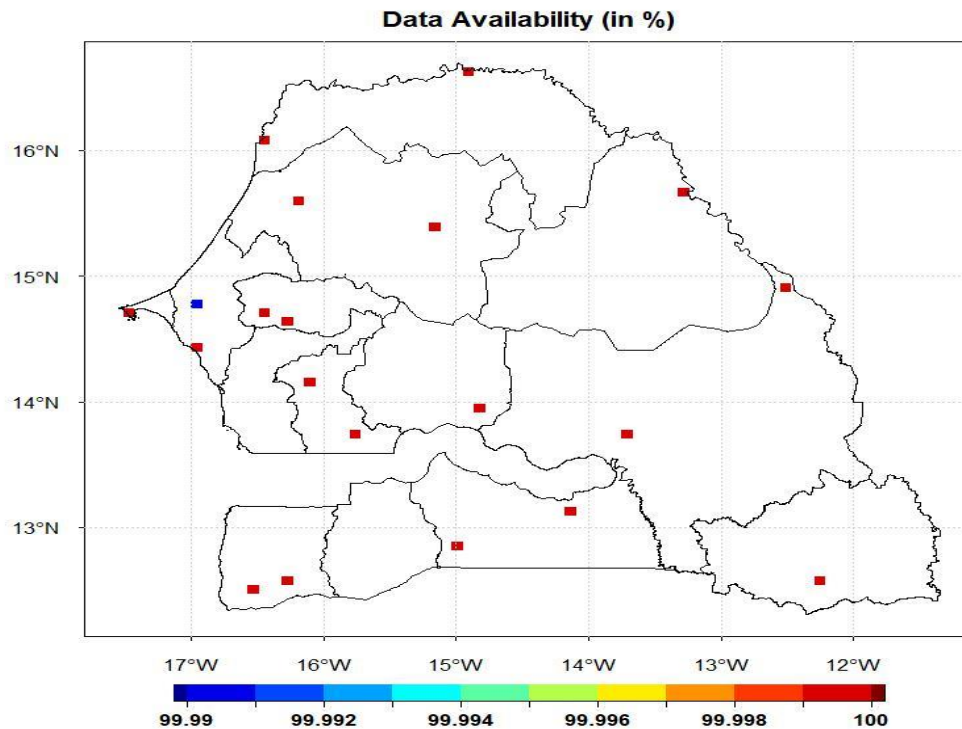

**Figure S1.** Figure 1. bis: Quality control and data homogeneity assessment database of the National Hydrological and Meteorological Services for Senegal (NHMS-SN). This figure illustrates the quality control and data homogeneity assessment. We observe a data availability percentage close to 100%.

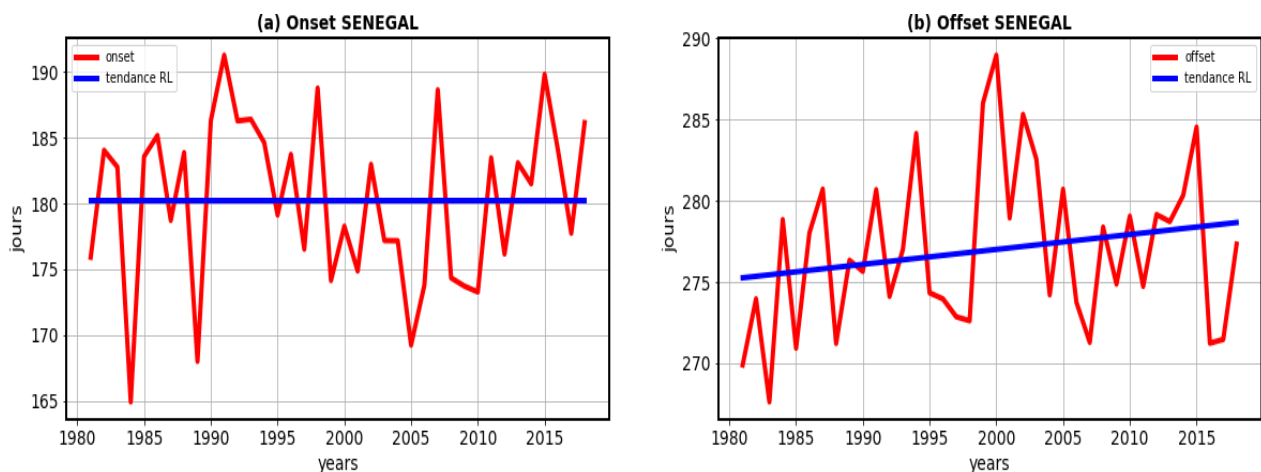

**Figure S2.** Figure-time-series: Interannual variability in the start and end dates of the rainy season in Senegal over the period 1981 to 2018. We observe that the earliest and latest start dates were 1984 and 1991 respectively, and the earliest and latest cessation dates were 1983 and 2000 respectively.
